# Supplementary material
Source: Springer Nature journal article supplement (https://www.springermedizin.de/resource/supplementary/12967_2008_291_MOESM1_ESM.pdf/9576124)

**(A) Lymphocyte**  
-FSC vs. SSC

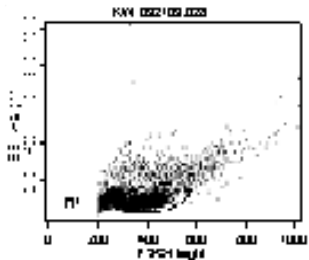

**(B) Viable cells**  
-FSC vs. PI

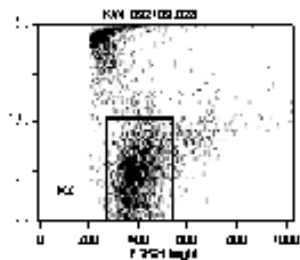

**(C) CD8<sup>+</sup> cells**  
-FSC vs. CD8 FITC

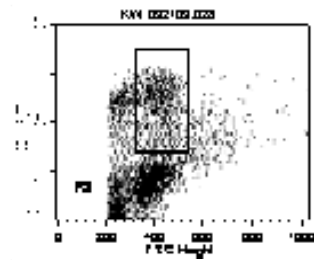

**(D) Flu tetramer positive cells**  
-CD8 FITC vs. Flu tetramer PE

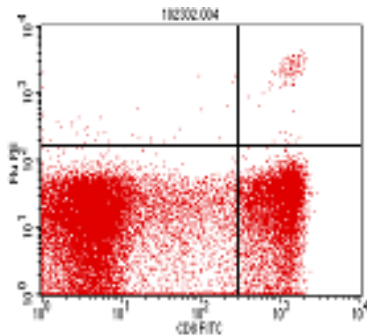

Supplement: MOESM1 [file 9576124]
